# Supplementary material for: Genome Analysis of Listeria monocytogenes Sequence Type 8 Strains Persisting in Salmon and Poultry Processing Environments and Comparison with Related Strains
Source: PubMed Central journal article supplement (PMC4783014; doi:10.1371/journal.pone.0151117), 2016-03-08
Supplement: pone.0151117.s002.pdf [file pone.0151117.s002.pdf]

**S2 Table (page 1 of 4): SNPs and indels detected in *L. monocytogenes* ST8 isolates.** The allelic state for each SNP/indel is presented relative to that found in the neighbour *L. monocytogenes* strains 10304S, 08-5578, and 08-5923. Plasmid and prophage regions in *L. monocytogenes* isolates Lm\_1823 and Lm\_1889 are disregarded.

| SNP Position (R479a)                                                                        | Locus tag (R479a)              | Protein length (amino acids) | Protein function (listed for non-synonymous substitutions)                                     | Nucleotide change              | Amino acid change                                                                |
|---------------------------------------------------------------------------------------------|--------------------------------|------------------------------|------------------------------------------------------------------------------------------------|--------------------------------|----------------------------------------------------------------------------------|
| <b>Variants common to R479a, MF4245, MF3949, MF4077, SHL004, Lm21045, MF5369 and MF5377</b> |                                |                              |                                                                                                |                                |                                                                                  |
| 16 488                                                                                      | LMR479A_0013                   | 368 aa                       | Cytochrome aa3-600 quinol oxidase (subunit II)                                                 | T→G                            | <sup>90</sup> Phe→Leu                                                            |
| 294 717                                                                                     | LMR479A_0287                   | 211 aa                       | Histidine phosphatase superfamily protein                                                      | G→A                            | <sup>87</sup> Met→Ile                                                            |
| 445 338                                                                                     | LMR479A_0443                   | 800 aa                       | Internalin A                                                                                   | C→T                            | <sup>192</sup> Ser→Phe                                                           |
| 593 818                                                                                     | LMR479A_0588                   | 487 aa                       | Conserved protein of unknown function, with Cell-wall surface anchor repeat domains            | G→A                            | <sup>154</sup> Val→Ile                                                           |
| 760 445                                                                                     | LMR479A_0773                   | 203 aa                       | Conserved protein of unknown function                                                          | C→T                            | <sup>52</sup> Ser→Phe                                                            |
| 768 185                                                                                     | LMR479A_0781                   | 418 aa                       | Putative GTP-binding protein, GTPase HFIX family protein                                       | G→T                            | <sup>318</sup> Ala→Ser                                                           |
| 897 886                                                                                     | LMR479A_0900                   | 189 aa                       | Putative exported adhesion protein (homologue to EGD-e <i>lmo0880</i> )                        | TT→T                           | Frameshift mutation at codon 168 resulting in premature termination at codon 190 |
| 1 346 148                                                                                   | LMR479A_1395                   | 434 aa                       | Conserved protein of unknown function DUF3440                                                  | A→T                            | <sup>108</sup> Trp→Arg                                                           |
| 1 384 317                                                                                   | LMR479A_1437                   | 488 aa                       | Glycine decarboxylase (subunit 2)                                                              | C→A                            | <sup>46</sup> Pro→Gln                                                            |
| 1 782 613                                                                                   | LMR479A_1815                   | 410 aa                       | Aminopeptidase                                                                                 | G→C                            | <sup>80</sup> Ala→Pro                                                            |
| 2 802 215                                                                                   | LMR479A_2861                   | 147 aa                       | Conserved protein with methyltransferase domain                                                | A→T                            | <sup>136</sup> Ser→Thr                                                           |
| 2 880 025                                                                                   | LMR479A_2930                   | 99 aa                        | Conserved exported protein of unknown function                                                 | G→C                            | <sup>26</sup> Ala→Gly                                                            |
| 24 172                                                                                      | LMR479A_0019 ↔<br>LMR479A_0020 |                              |                                                                                                | G→C                            | noncoding                                                                        |
| 692 692                                                                                     | LMR479A_0696                   |                              |                                                                                                | G→A                            | synonymous                                                                       |
| 786 365                                                                                     | LMR479A_0801                   |                              |                                                                                                | C→T                            | synonymous                                                                       |
| 840 061                                                                                     | LMR479A_0848←<br>LMR479A_0849  |                              |                                                                                                | T <sub>9</sub> →T <sub>8</sub> | noncoding                                                                        |
| 845 621                                                                                     | LMR479A_0855                   |                              |                                                                                                | C→T                            | synonymous                                                                       |
| 1 045 439                                                                                   | LMR479A_1063                   |                              |                                                                                                | G→A                            | synonymous                                                                       |
| 1 057 028                                                                                   | LMR479A_1079→<br>LMR479A_1080  |                              |                                                                                                | C→T                            | noncoding                                                                        |
| 1 406 210                                                                                   | LMR479A_1460                   |                              |                                                                                                | G→A                            | synonymous                                                                       |
| 1 663 673                                                                                   | LMR479A_1705                   |                              |                                                                                                | G→T                            | synonymous                                                                       |
| 2 429 990                                                                                   | LMR479A_2477                   |                              |                                                                                                | T→C                            | synonymous                                                                       |
| 2 687 274                                                                                   | LMR479A_2731→←<br>LMR479A_2732 |                              |                                                                                                | G→A                            | noncoding                                                                        |
| <b>Variants common to R479a, MF4245, MF3949, MF4077, SHL004, and Lm21045</b>                |                                |                              |                                                                                                |                                |                                                                                  |
| 122 794                                                                                     | LMR479A_0119                   | 235 aa                       | EAL domain-containing phosphodiesterase PdeD                                                   | G→A                            | <sup>221</sup> Val→Ile                                                           |
| 2 873 741                                                                                   | LMR479A_2923                   | 327 aa                       | ADP-ribosylation/Crystallin J1 family protein                                                  | C→G                            | <sup>24</sup> Cys→Ser                                                            |
| <b>Variants common to R479a, MF4245, MF3949 and MF4077</b>                                  |                                |                              |                                                                                                |                                |                                                                                  |
| 2 096 262                                                                                   | LMR479A_2124                   | 885 aa                       | Putative alpha-mannosidase MngB                                                                | G→A                            | <sup>795</sup> Ala→Val                                                           |
| 2 220 337                                                                                   | LMR479A_2241                   | 607 aa                       | Putative metabolite transporter                                                                | G→T                            | <sup>208</sup> His→Asn                                                           |
| 2 605 097                                                                                   | LMR479A_2651                   | 331 aa                       | MreB-like cell shape determining protein                                                       | G→A                            | <sup>63</sup> Pro→Leu                                                            |
| 126 081                                                                                     | LMR479A_0125                   |                              |                                                                                                | A→G                            | synonymous                                                                       |
| 1 251 584                                                                                   | LMR479A_1290→<br>LMR479A_1291  |                              | Note: Located in tRNA-Arg <sup>CT</sup> prophage (not present in Lm21045, Lm_1823 and Lm_1889) | T→C                            | noncoding                                                                        |
| 2 155 786                                                                                   | LMR479A_2180↔<br>LMR479A_2181  |                              |                                                                                                | A→G                            | noncoding                                                                        |
| 2 208 238                                                                                   | LMR479A_2232                   |                              |                                                                                                | A→G                            | synonymous                                                                       |
| 2 520 292                                                                                   | LMR479A_2571↔<br>LMR479A_2572  |                              |                                                                                                | T→A                            | noncoding                                                                        |
| 2 822 750                                                                                   | LMR479A_2881↔<br>LMR479A_2882  |                              |                                                                                                | T→A                            | noncoding                                                                        |
| <b>Variants unique to R479a</b>                                                             |                                |                              |                                                                                                |                                |                                                                                  |
| 883 111                                                                                     | LMR479A_0884                   | 557 aa                       | Phosphoglucosyltransferase                                                                     | T→G                            | <sup>304</sup> Val→Gly                                                           |
| 1 388 589                                                                                   | LMR479A_1441                   | 353 aa                       | Putative aminopeptidase                                                                        | T→C                            | <sup>344</sup> Ile→Thr                                                           |
| 2 128 656                                                                                   | LMR479A_2151                   | 738 aa                       | Penicillin-binding protein 2B                                                                  | C→G                            | <sup>323</sup> Ala→Pro                                                           |
| 2 302 826                                                                                   | LMR479A_2320                   | 866 aa                       | ATP-dependent protease ClpB                                                                    | A→T                            | <sup>74</sup> Ser→Thr                                                            |
| 368 857                                                                                     | LMR479A_0359                   |                              |                                                                                                | A→C                            | synonymous                                                                       |
| 1 252 780                                                                                   | LMR479A_1293→<br>LMR479A_1294  |                              | Note: Located in tRNA-Arg <sup>CT</sup> prophage (not present in Lm21045, Lm_1823 and Lm_1889) | C→T                            | noncoding                                                                        |
| 1 389 453                                                                                   | LMR479A_1443                   |                              |                                                                                                | T→C                            | synonymous                                                                       |
| <b>Variant common to MF4245, MF3949 and MF4077</b>                                          |                                |                              |                                                                                                |                                |                                                                                  |
| 326 353                                                                                     | LMR479A_0318                   |                              |                                                                                                | G→A                            | synonymous                                                                       |
| <b>Variant unique to MF4245</b>                                                             |                                |                              |                                                                                                |                                |                                                                                  |
| 2 245 825                                                                                   | LMR479A_2268                   |                              |                                                                                                | C→T                            | synonymous                                                                       |

S2 Table, continued (page 2 of 4):

| SNP Position (R479a)              | Locus tag (R479a)                               | Protein length (amino acids) | Protein function (listed for non-synonymous substitutions)                               | Nucleotide change              | Amino acid change                                                                |
|-----------------------------------|-------------------------------------------------|------------------------------|------------------------------------------------------------------------------------------|--------------------------------|----------------------------------------------------------------------------------|
| <b>Variants unique to MF3949</b>  |                                                 |                              |                                                                                          |                                |                                                                                  |
| 114 570                           | LMR479A_0113                                    | 756 aa                       | Putative chitinase                                                                       | A <sub>5</sub> →A <sub>4</sub> | Frameshift mutation at codon 496 resulting in premature termination at codon 504 |
| 388 086                           | LMR479A_0381                                    | 237 aa                       | Putative transcriptional regulator (GntR family HTH domain)                              | G→A                            | <sup>65</sup> Ala→Val                                                            |
| 1 136 271                         | LMR479A_1157                                    | 382 aa                       | Predicted immunity protein 14 family protein                                             | G→T                            | <sup>305</sup> Glu→Asp                                                           |
| 2 080 048                         | LMR479A_2109                                    | 354 aa                       | Conserved protein with sugar isomerase domains                                           | A→G                            | <sup>1391</sup> Leu→Ser                                                          |
| 2 627 502                         | LMR479A_2678                                    | 315 aa                       | Putative glycosyltransferase 2, CsbB                                                     | T→A                            | Nonsense mutation at codon <sup>1491</sup> Lys                                   |
| 15 888                            | LMR479A_0012→<br>LMR479A_0013                   |                              |                                                                                          | A→G                            | noncoding                                                                        |
| 744 990                           | LMR479A_0753                                    |                              |                                                                                          | G→A                            | synonymous                                                                       |
| 1 322 132                         | LMR479A_1372→<br>LMR479A_1373                   |                              |                                                                                          | G→T                            | noncoding                                                                        |
| 2 648 729                         | LMR479A_2696←<br>LMR479A_2697                   |                              |                                                                                          | G→A                            | noncoding                                                                        |
| 2 834 901                         | LMR479A_2892                                    |                              |                                                                                          | G→A                            | synonymous                                                                       |
| <b>Variants unique to MF4077</b>  |                                                 |                              |                                                                                          |                                |                                                                                  |
| 1 643 093                         | LMR479A_1685                                    | 343 aa                       | N-acetylglutamate gamma-semialdehyde dehydrogenase, ArgC                                 | C→T                            | Nonsense mutation at codon <sup>215</sup> Trp                                    |
| 1 759 340                         | LMR479A_1786                                    | 313 aa                       | Conserved protein of unknown function (NAD-dependent 2-hydroxyacid dehydrogenase domain) | G→A                            | <sup>198</sup> Pro→Leu                                                           |
| <b>Variants unique to SHL004</b>  |                                                 |                              |                                                                                          |                                |                                                                                  |
| 74 820                            | LMR479A_0070                                    | 160 aa                       | Conserved protein of unknown function                                                    | A <sub>9</sub> →A <sub>8</sub> | Frameshift mutation at codon 13 resulting in premature termination at codon 28   |
| 220 906                           | LMR479A_0223                                    | 1179 aa                      | Transcription-repair coupling factor                                                     | C→T                            | <sup>27</sup> Ala→Val                                                            |
| 270 600                           | LMR479A_0272                                    | 276 aa                       | Maltose/maltodextrin transport system permease protein                                   | T→G                            | <sup>64</sup> Phe→Val                                                            |
| 283 803                           | LMR479A_0279                                    | 486 aa                       | Aryl-phospho-beta-d-glucosidase                                                          | C→T                            | <sup>278</sup> Thr→Ile                                                           |
| 490 642                           | LMR479A_0490                                    | 159 aa                       | Conserved protein with GyrI-like small molecule binding domain                           | T <sub>5</sub> →T <sub>6</sub> | Frameshift mutation at codon 21 resulting in premature termination at codon 23   |
| 1 375 444                         | LMR479A_1425                                    | 322 aa                       | Glucose kinase                                                                           | G→A                            | <sup>90</sup> Gly→Glu                                                            |
| 1 450 157                         | LMR479A_1499<br>(overlaps with<br>LMR479A_1500) | 49 aa                        | Protein of unknown function                                                              | A→G                            | <sup>3</sup> Leu→Pro                                                             |
|                                   | LMR479A_1500<br>(overlaps with<br>LMR479A_1499) | 75 aa                        | Putative transcriptional regulator (Cro/C1-type HTH domain)                              |                                | <sup>41</sup> Ser→Gly                                                            |
| 1 553 799                         | LMR479A_1604                                    | 246 aa                       | Conserved exported protein with alpha/beta hydrolase fold                                | G→A                            | <sup>5</sup> Ala→Val                                                             |
| 2 124 420                         | LMR479A_2148                                    | 455 aa                       | UDP-N-acetylmuramoylalanyl-D-glutamate ligase                                            | C→T                            | <sup>59</sup> Val→Ile                                                            |
| 2 221 835                         | LMR479A_tRNA14                                  |                              | tRNA-Lys                                                                                 | C→T                            | mutation in tRNA                                                                 |
| 2 261 712                         | LMR479A_2285                                    | 455 aa                       | Putative regulatory protein (sigma-54 factor interaction domain and Fis-type HTH domain) | GG→G                           | Frameshift mutation at codon 201 resulting in premature termination at codon 240 |
| 2 728 883                         | LMR479A_2787                                    | 688 aa                       | Putative transcriptional antiterminator protein                                          | C→T                            | <sup>25</sup> Glu→Lys                                                            |
| 202 968                           | LMR479A_0204→<br>LMR479A_0205                   |                              |                                                                                          | T <sub>8</sub> →T <sub>7</sub> | noncoding                                                                        |
| 1 462 667                         | LMR479A_1511                                    |                              |                                                                                          | C→A                            | synonymous                                                                       |
| 2 344 668                         | LMR479A_2364                                    |                              |                                                                                          | T→C                            | synonymous                                                                       |
| <b>Variants unique to Lm21045</b> |                                                 |                              |                                                                                          |                                |                                                                                  |
| 905 701                           | LMR479A_0910                                    | 278 aa                       | Anti-sigma B factor antagonist; component of the stressosome                             | C→T                            | <sup>77</sup> Leu→Phe                                                            |
| 1 588 836                         | LMR479A_1637                                    | 266 aa                       | ATP binding protein MinD; activator of MinC                                              | G→A                            | <sup>194</sup> His→Tyr                                                           |
| 217 460                           | LMR479A_0218←<br>LMR479A_0219                   |                              |                                                                                          | G→A                            | noncoding                                                                        |
| 429 729                           | LMR479A_0427                                    |                              |                                                                                          | A→G                            | synonymous                                                                       |
| 743 515                           | LMR479A_0751→<br>LMR479A_0752                   |                              |                                                                                          | T→G                            | noncoding                                                                        |
| 1 284 339                         | LMR479A_1331→<br>←<br>LMR479A_1332              |                              |                                                                                          | G→A                            | noncoding                                                                        |
| 1 538 406                         | LMR479A_1590                                    |                              |                                                                                          | A→T                            | synonymous                                                                       |
| 2 437 733                         | LMR479A_2484                                    |                              |                                                                                          | C→T                            | synonymous                                                                       |

S2 Table, continued (page 3 of 4):

| SNP Position (R479a)                        | Locus tag (R479a)             | Protein length (amino acids) | Protein function (listed for non-synonymous substitutions)                                                                                                                                               | Nucleotide change | Amino acid change                                                        |
|---------------------------------------------|-------------------------------|------------------------------|----------------------------------------------------------------------------------------------------------------------------------------------------------------------------------------------------------|-------------------|--------------------------------------------------------------------------|
| <b>Variants common to MF5369 and MF5377</b> |                               |                              |                                                                                                                                                                                                          |                   |                                                                          |
| 81 788                                      | LMR479A_0080                  | 322 aa                       | Conserved protein of unknown function                                                                                                                                                                    | A→T               | <sup>318</sup> Asn→Tyr                                                   |
| 89 881                                      | LMR479A_0091                  | 327 aa                       | Aldo/keto reductase family protein                                                                                                                                                                       | G→C               | <sup>306</sup> Ala→Gly                                                   |
| 191 404                                     | LMR479A_0193                  | 553 aa                       | Trehalose-6-phosphate hydrolase                                                                                                                                                                          | G→T               | Nonsense mutation at codon <sup>171</sup> Glu                            |
| 336 167                                     | LMR479A_0328                  | 224 aa                       | Thiaminase II family protein                                                                                                                                                                             | T→A               | <sup>94</sup> Leu→Gln                                                    |
| 586 074                                     | LMR479A_0581                  | 393 aa                       | ATP phosphoribosyltransferase regulatory subunit                                                                                                                                                         | C→T               | <sup>224</sup> Ala→Thr                                                   |
| 635 972                                     | LMR479A_0629                  | 583 aa                       | Glycerophosphoryl diester phosphodiesterase                                                                                                                                                              | C→A               | <sup>501</sup> Pro→Gln                                                   |
| 721 085                                     | LMR479A_0725                  | 429 aa                       | Flagellar capping protein FliD                                                                                                                                                                           | C→A               | <sup>188</sup> Ala→Glu                                                   |
| 866 401                                     | LMR479A_0867                  | 616 aa                       | Amidase                                                                                                                                                                                                  | G→A               | Nonsense mutation at codon <sup>490</sup> Gln                            |
| 1 216 789                                   | LMR479A_1247                  | 1066 aa                      | Putative membrane transport protein                                                                                                                                                                      | A→C               | <sup>94</sup> Thr→Pro                                                    |
| 1 575 765                                   | LMR479A_1623                  | 379 aa                       | tRNA-guanine transglycosylase                                                                                                                                                                            | A→T               | <sup>168</sup> Ser→Ser                                                   |
| 1 641 346                                   | LMR479A_1683                  | 250 aa                       | Acetylglutamate kinase                                                                                                                                                                                   | C→T               | Nonsense mutation at codon <sup>50</sup> Glu                             |
| 1 713 743                                   | LMR479A_1752                  | 164 aa                       | Putative cell surface metalloproteinase                                                                                                                                                                  | T→C               | <sup>25</sup> Asp→Gly                                                    |
| 2 343 482                                   | LMR479A_2362                  | 89 aa                        | Predicted protein                                                                                                                                                                                        | G→T               | <sup>32</sup> Arg→Ile                                                    |
| 2 433 908                                   | LMR479A_2480                  | 927 aa                       | Transmembrane protein                                                                                                                                                                                    | G→C               | <sup>2101</sup> Leu→Val                                                  |
| 2 812 935                                   | LMR479A_2871                  | 882 aa                       | Putative glycoside hydrolase                                                                                                                                                                             | A→T               | <sup>803</sup> Asn→Ile                                                   |
| 2 820 402                                   | LMR479A_2878                  | 402 aa                       | Putative metabolite efflux transporter, major facilitator superfamily                                                                                                                                    | A→C               | Nonsense mutation at codon <sup>80</sup> Leu                             |
| p22414                                      | LMR479A_p0022                 | 190 aa                       | Note: in plasmid (not present in Lm_1823 and Lm_1889). Conserved protein of unknown function                                                                                                             | T→G               | <sup>101</sup> Lys→Thr                                                   |
| p43471                                      | LMR479A_p0049                 | 165 aa                       | Conserved protein of unknown function. Note: in plasmid (not present in Lm_1823 and Lm_1889)                                                                                                             | G→A               | <sup>33</sup> Arg→Cys                                                    |
| 188 598                                     | LMR479A_0191→<br>LMR479A_0192 |                              |                                                                                                                                                                                                          | G→A               | noncoding                                                                |
| 304 677                                     | LMR479A_0297                  |                              |                                                                                                                                                                                                          | C→T               | synonymous                                                               |
| 807 840                                     | LMR479A_0818                  |                              |                                                                                                                                                                                                          | G→A               | synonymous                                                               |
| 1 218 015                                   | LMR479A_1247                  |                              |                                                                                                                                                                                                          | C→T               | synonymous                                                               |
| 1 605 295                                   | LMR479A_1652                  |                              |                                                                                                                                                                                                          | A→T               | synonymous                                                               |
| 1 639 027                                   | LMR479A_1681                  |                              |                                                                                                                                                                                                          | C→A               | synonymous                                                               |
| 1 836 744                                   | LMR479A_1863                  |                              |                                                                                                                                                                                                          | T→C               | synonymous                                                               |
| 2 392 458                                   | LMR479A_2420                  |                              | Note: Located in <i>comK</i> prophage (not present in Lm_1823 and Lm_1889)                                                                                                                               | C→T               | synonymous                                                               |
| 2 803 632                                   | LMR479A_2862                  |                              |                                                                                                                                                                                                          | A→G               | synonymous                                                               |
| <b>Variants unique to MF5377</b>            |                               |                              |                                                                                                                                                                                                          |                   |                                                                          |
| 111 554                                     | LMR479A_0110                  | 96 aa                        | Conserved protein with antibiotic biosynthesis monooxygenase-like domain                                                                                                                                 | G→A               | Nonsense mutation at codon <sup>56</sup> Trp                             |
| 1 870 855                                   | LMR479A_1898                  | 156 aa                       | Putative transcriptional regulator (MerR-type HTH domain)                                                                                                                                                | T→G               | <sup>57</sup> His→Gln                                                    |
| <b>Variants unique to Lm_1823</b>           |                               |                              |                                                                                                                                                                                                          |                   |                                                                          |
| 859 967                                     | LMR479A_0860                  | 2047 aa                      | Peptidoglycan binding protein. Note: One of the VNTR loci used for MLVA profiling (locus LMV7) is located in this gene (Lindstedt et al., 2008). The indicated mutation results in altered MLVA subtype. | C→CCAAAAT<br>ATC  | Increases the number of CCT-ATA-AAA (Pro-Ile-Lys) repeats from 5 to 6    |
| 2 867 916                                   | LMR479A_2920                  | 431 aa                       | Phosphotransferase system, cellobiose-type IIC component                                                                                                                                                 | A→T               | <sup>341</sup> Val→Glu                                                   |
| <b>Variant unique to Lm_1889</b>            |                               |                              |                                                                                                                                                                                                          |                   |                                                                          |
| 529 380                                     | LMR479A_0528                  | 1020 aa                      | Type I restriction endonuclease HsdR                                                                                                                                                                     | ATTAG→<br>CTAAT   | <sup>806</sup> Gln→His and nonsense mutation at codon <sup>807</sup> Leu |

**S2 Table, continued (page 4 of 4):**

| SNP Position (R479a)                          | Locus tag (R479a)             | Protein length (amino acids) | Protein function (listed for non-synonymous substitutions)                                | Nucleotide change | Amino acid change                                                            |
|-----------------------------------------------|-------------------------------|------------------------------|-------------------------------------------------------------------------------------------|-------------------|------------------------------------------------------------------------------|
| <b>Variants common to Lm_1823 and Lm_1889</b> |                               |                              |                                                                                           |                   |                                                                              |
| 27 108                                        | LMR479A_0024                  | 275 aa                       | Phosphotransferase system (PTS), mannose/fructose/sorbose family IID component            | G→A               | <sup>157</sup> Val→Ile                                                       |
| 78 406                                        | LMR479A_0075                  | 151 aa                       | Conserved protein of unknown function                                                     | G→T               | Nonsense mutation at codon <sup>109</sup> Glu                                |
| 252 873                                       | LMR479A_0248                  | 234 aa                       | 2-C-methyl-D-erythritol 4-phosphate cytidyltransferase                                    | G→T               | <sup>161</sup> Val→Phe                                                       |
| 268 746                                       | LMR479A_0270                  | 408 aa                       | Maltose/maltodextrin transport system substrate-binding protein                           | G→A               | <sup>307</sup> Ala→Thr                                                       |
| 330 768                                       | LMR479A_0321                  | 463 aa                       | 6-phospho-beta-galactosidase                                                              | T→C               | <sup>78</sup> Lys→Arg                                                        |
| 357 236                                       | LMR479A_0344                  | 1778 aa                      | Internalin I                                                                              | G→A               | <sup>1140</sup> Val→Ile                                                      |
| 424 925                                       | LMR479A_0421                  | 867 aa                       | putative PEP-dependent enzyme                                                             | G→A               | <sup>18</sup> Leu→Phe                                                        |
| 480 884                                       | LMR479A_0473                  | 58 aa                        | Conserved protein of unknown function                                                     | G→A               | <sup>11</sup> Gly→Glu                                                        |
| 682 129                                       | LMR479A_0681                  | 288 aa                       | HAD-superfamily hydrolase protein                                                         | C→T               | <sup>246</sup> Met→Ile                                                       |
| 822 736                                       | LMR479A_0836                  | 876 aa                       | Calcium-transporting ATPase                                                               | G→A               | <sup>140</sup> Gly→Glu                                                       |
| 860 558                                       | LMR479A_0861                  | 85 aa                        | Conserved protein of unknown function DUF1294                                             | T→C               | <sup>20</sup> Ile→Val                                                        |
| 872 904                                       | LMR479A_0875                  | 470 aa                       | UDP-N-acetylmuramoylalanyl-D-glutamyl-2,6-diaminopimelate-D-alanyl-D-alanine ligase       | G→A               | <sup>248</sup> Gly→Ser                                                       |
| 951 071                                       | LMR479A_0957                  | 169 aa                       | 2'-O-methyltransferase TrmL                                                               | A→T               | Mutation at stop codon resulting in fusion with downstream gene LMR479A_0958 |
| 1 132 620                                     | LMR479A_1153                  | 571 aa                       | Uncharacterized ABC transporter ATP-binding protein                                       | A→T               | <sup>471</sup> Gln→Leu                                                       |
| 1 315 314                                     | LMR479A_1367                  | 290 aa                       | Aldose 1-/Glucose-6-phosphate 1-epimerase family protein                                  | T→G               | <sup>151</sup> Asp→Glu                                                       |
| 1 327 345                                     | LMR479A_1375                  | 622 aa                       | Putative peptidoglycan O-acetyltransferase                                                | C→G               | <sup>279</sup> Met→Ile                                                       |
| 1 373 081                                     | LMR479A_1422                  | 179 aa                       | 5-formyltetrahydrofolate cyclo-ligase family protein                                      | C→T               | <sup>111</sup> Thr→Ile                                                       |
| 1 485 204                                     | LMR479A_1531                  | 235 aa                       | Putative branched-chain amino acid transport, permease; AzIC family                       | T→A               | <sup>180</sup> Leu→Ile                                                       |
| 1 729 063                                     | LMR479A_1765                  | 1711 aa                      | Peptidoglycan linked protein (LPXTG)                                                      | C→A               | <sup>1155</sup> Val→Phe                                                      |
| 1 840 812                                     | LMR479A_1865                  | 225 aa                       | (S)-3-O-geranylgeranylglycerol phosphate synthase                                         | C→T               | <sup>122</sup> Ala→Thr                                                       |
| 1 926 560                                     | LMR479A_1952                  | 274 aa                       | Conserved protein with STAS domain                                                        | G→A               | <sup>230</sup> Gly→Ser                                                       |
| 1 951 211                                     | LMR479A_1979                  | 327 aa                       | Conserved protein of unknown function DUF939                                              | C→A               | <sup>11</sup> Ala→Ser                                                        |
| 2 001 328                                     | LMR479A_2027                  | 421 aa                       | Putative NAD(FAD) dehydrogenase                                                           | C→T               | <sup>168</sup> Val→Ile                                                       |
| 2 156 041                                     | LMR479A_2181                  | 228 aa                       | CAAX amino terminal protease family protein                                               | T→C               | <sup>84</sup> Leu→Arg                                                        |
| 2 316 452                                     | LMR479A_2335                  | 907 aa                       | Conserved protein with P-loop NTPase domains                                              | G→T               | <sup>301</sup> Asn→Lys                                                       |
| 2 366 003                                     | LMR479A_2383                  | 78 aa                        | Conserved protein with IDEAL domain                                                       | G→C               | <sup>24</sup> Thr→Arg                                                        |
| 2 415 961                                     | LMR479A_2462                  | 440 aa                       | Putative monooxygenase                                                                    | G→A               | Nonsense mutation at codon <sup>337</sup> Arg                                |
| 2 543 393                                     | LMR479A_2592                  | 477 aa                       | Exported putative carbohydrate-binding protein                                            | C→T               | <sup>18</sup> Val→Ile                                                        |
| 2 565 167                                     | LMR479A_2613                  | 956 aa                       | UvrABC system subunit A                                                                   | C→T               | <sup>627</sup> Ala→Thr                                                       |
| 2 662 606                                     | LMR479A_2709                  | 222 aa                       | Putative hemin import ATP-binding protein HrtA                                            | C→T               | <sup>20</sup> Glu→Lys                                                        |
| 2 860 047                                     | LMR479A_2912                  | 279 aa                       | Transcription antiterminator LicT                                                         | A→C               | <sup>80</sup> Phe→Cys                                                        |
| 268 787                                       | LMR479A_0270                  |                              |                                                                                           | G→A               | synonymous                                                                   |
| 442 643                                       | LMR479A_0440↔<br>LMR479A_0441 |                              |                                                                                           | C→T               | noncoding                                                                    |
| 546 025                                       | LMR479A_0541                  |                              |                                                                                           | G→A               | synonymous                                                                   |
| 580 135                                       | LMR479A_0572←<br>LMR479A_0573 |                              |                                                                                           | C→T               | noncoding                                                                    |
| 615 311                                       | LMR479A_0606                  |                              |                                                                                           | G→A               | synonymous                                                                   |
| 735 733                                       | LMR479A_0742                  |                              |                                                                                           | C→T               | synonymous                                                                   |
| 864 258                                       | LMR479A_0865                  |                              |                                                                                           | C→T               | synonymous                                                                   |
| 870 849                                       | LMR479A_0873                  |                              |                                                                                           | C→A               | synonymous                                                                   |
| 1 155 986                                     | LMR479A_1182                  |                              |                                                                                           | T→C               | synonymous                                                                   |
| 1 205 445                                     | LMR479A_1238                  |                              |                                                                                           | C→A               | synonymous                                                                   |
| 1 315 413                                     | LMR479A_1367                  |                              |                                                                                           | G→A               | synonymous                                                                   |
| 1 686 793                                     | LMR479A_1730↔<br>LMR479A_1731 |                              | Note: The mutation was located in LMR479A_misc_RNA_30; T-box (RF00230), intergenic region | A→T               | RNA/noncoding                                                                |
| 1 822 221                                     | LMR479A_1849                  |                              |                                                                                           | A→C               | synonymous                                                                   |
| 1 972 976                                     | LMR479A_2001                  |                              |                                                                                           | T→A               | synonymous                                                                   |
| 2 487 240                                     | LMR479A_2537                  |                              |                                                                                           | G→A               | synonymous                                                                   |
| 2 504 930                                     | LMR479A_2558                  |                              |                                                                                           | G→T               | synonymous                                                                   |
| 2 855 890                                     | LMR479A_2909                  |                              |                                                                                           | A→G               | synonymous                                                                   |
