# Supplementary material for: Genome Analysis of Listeria monocytogenes Sequence Type 8 Strains Persisting in Salmon and Poultry Processing Environments and Comparison with Related Strains
Source: PubMed Central journal article supplement (PMC4783014; doi:10.1371/journal.pone.0151117), 2016-03-08
Supplement: pone.0151117.s003.pdf [file pone.0151117.s003.pdf]

**S3 Table: Accessory genome in ST8 isolates relative to *L. monocytogenes* strains EGD-e and 10403S. Genes in prophages and plasmids are disregarded.**

| Locus tag (LMR479A_)                                                                                                                                                                                                                                                                                                                                                      | Protein length | Annotation (R479a GenBank file)                                 | Protein family membership (INTERPROSCAN)                | Domains and repeats (INTERPROSCAN)                                                                                          |
|---------------------------------------------------------------------------------------------------------------------------------------------------------------------------------------------------------------------------------------------------------------------------------------------------------------------------------------------------------------------------|----------------|-----------------------------------------------------------------|---------------------------------------------------------|-----------------------------------------------------------------------------------------------------------------------------|
| <b>LMR479A_0029-0035 is inserted between <i>lmo0028-lmos01(rli1)</i> and <i>lmo0029</i> in EGD-e.</b>                                                                                                                                                                                                                                                                     |                |                                                                 |                                                         |                                                                                                                             |
| 0029                                                                                                                                                                                                                                                                                                                                                                      | 206 aa         | conserved protein of unknown function                           | None predicted                                          | None predicted                                                                                                              |
| 0030                                                                                                                                                                                                                                                                                                                                                                      | 209 aa         | putative ATP-binding cassette protein                           | None predicted                                          | AAA+ ATPase domain (IPR003593); ABC transporter-like (IPR003439)                                                            |
| 0031                                                                                                                                                                                                                                                                                                                                                                      | 240 aa         | conserved membrane protein of unknown function                  | Protein of unknown function DUF2705 (IPR024295)         | None predicted                                                                                                              |
| 0032                                                                                                                                                                                                                                                                                                                                                                      | 237 aa         | conserved membrane protein of unknown function                  | None predicted                                          | None predicted                                                                                                              |
| 0033                                                                                                                                                                                                                                                                                                                                                                      | 254 aa         | putative integral inner membrane protein                        | None predicted                                          | None predicted                                                                                                              |
| 0034                                                                                                                                                                                                                                                                                                                                                                      | 146 aa         | conserved exported protein of unknown function                  | Protein of unknown function DUF2712 (IPR020208)         | None predicted                                                                                                              |
| 0035                                                                                                                                                                                                                                                                                                                                                                      | 63 aa          | protein of unknown function                                     | None predicted                                          | None predicted                                                                                                              |
| <b>LMR479A_0070-82 is inserted between <i>lmo0061</i> (homologue to LMR479A_0069) and <i>lmo0072</i> (homologue to LMR479A_0083) in EGD-e (EGD-e has different genes at this location) LMR479A_0084 is inserted into/in place of (partly) the EGD-e gene <i>lmo0074</i>.<br/><i>lmo0061-0075</i> are anchor genes for hypervariable hotspot #1 (Kuenne et al., 2013).</b> |                |                                                                 |                                                         |                                                                                                                             |
| 0070                                                                                                                                                                                                                                                                                                                                                                      | 160 aa         | conserved protein of unknown function                           | None predicted                                          | None predicted                                                                                                              |
| 0071                                                                                                                                                                                                                                                                                                                                                                      | 104 aa         | conserved protein of unknown function                           | None predicted                                          | None predicted                                                                                                              |
| 0072                                                                                                                                                                                                                                                                                                                                                                      | 148 aa         | conserved protein of unknown function                           | None predicted                                          | None predicted                                                                                                              |
| 0073                                                                                                                                                                                                                                                                                                                                                                      | 422 aa         | conserved protein of unknown function                           | None predicted                                          | None predicted                                                                                                              |
| 0074                                                                                                                                                                                                                                                                                                                                                                      | 185 aa         | putative secreted lipoprotein                                   | None predicted                                          | None predicted                                                                                                              |
| 0075                                                                                                                                                                                                                                                                                                                                                                      | 151 aa         | conserved protein of unknown function                           | None predicted                                          | None predicted                                                                                                              |
| 0076                                                                                                                                                                                                                                                                                                                                                                      | 141 aa         | conserved membrane protein of unknown function                  | None predicted                                          | None predicted                                                                                                              |
| 0077                                                                                                                                                                                                                                                                                                                                                                      | 75 aa          | Predicted protein                                               | None predicted                                          | None predicted                                                                                                              |
| 0083                                                                                                                                                                                                                                                                                                                                                                      | 213 aa         | conserved exported protein of unknown function                  | None predicted                                          | None predicted                                                                                                              |
| 0084                                                                                                                                                                                                                                                                                                                                                                      | 210 aa         | conserved protein of unknown function                           | None predicted                                          | None predicted                                                                                                              |
| <b>LMR479A_0269-0274 is inserted between <i>lmo0257-0258</i> in EGD-e. LMR479A_0275 is partly present in EGD-e, in unannotated region between <i>lmo0257-0258</i>.</b>                                                                                                                                                                                                    |                |                                                                 |                                                         |                                                                                                                             |
| 0269                                                                                                                                                                                                                                                                                                                                                                      | 331 aa         | Transcriptional regulator, LacI family                          | None predicted                                          | Transcription regulator HTH, LacI (IPR000843), Periplasmic binding protein-like I (IPR028082)                               |
| 0270                                                                                                                                                                                                                                                                                                                                                                      | 408 aa         | Maltose/maltodextrin transport system substrate-binding protein | None predicted                                          | None predicted                                                                                                              |
| 0271                                                                                                                                                                                                                                                                                                                                                                      | 445 aa         | Maltose/maltodextrin transport system permease protein          | None predicted                                          | ABC transporter type 1, transmembrane domain MetI-like (IPR000515)                                                          |
| 0272                                                                                                                                                                                                                                                                                                                                                                      | 276 aa         | Maltose/maltodextrin transport system permease protein          | None predicted                                          | ABC transporter type 1, transmembrane domain MetI-like (IPR000515)                                                          |
| 0273                                                                                                                                                                                                                                                                                                                                                                      | 565 aa         | Oligo-1,6-glucosidase                                           | Glycoside hydrolase, family 13 (IPR015902)              | Glycosyl hydrolase, family 13, subfamily, catalytic domain (IPR006589), Glycosyl hydrolase, family 13, all-beta (IPR013780) |
| 0274                                                                                                                                                                                                                                                                                                                                                                      | 480 aa         | Sucrose phosphorylase                                           | Sucrose phosphorylase, GftA (IPR022527)                 | Glycosyl hydrolase, family 13, subfamily, catalytic domain (IPR006589)                                                      |
| 0275                                                                                                                                                                                                                                                                                                                                                                      | 81 aa          | conserved protein of unknown function                           | None predicted                                          | None predicted                                                                                                              |
| <b>LMR479A_0346-0349 is inserted between <i>lmo0334</i> (homologue to LMR479A_0345) and <i>lmo0340</i> (homologue to LMR479A_0351) in EGD-e (EGD-e has different genes at this location). LMR479A_0350 is partly present in EGD-e, in unannotated region between <i>lmo0338-0339</i>.</b>                                                                                 |                |                                                                 |                                                         |                                                                                                                             |
| 0346                                                                                                                                                                                                                                                                                                                                                                      | 131 aa         | conserved protein of unknown function                           | Uncharacterised conserved protein UCP019853 (IPR016767) | None predicted                                                                                                              |
| 0347                                                                                                                                                                                                                                                                                                                                                                      | 39 aa          | conserved protein of unknown function                           | None predicted                                          | None predicted                                                                                                              |
| 0348                                                                                                                                                                                                                                                                                                                                                                      | 76 aa          | conserved protein of unknown function                           | None predicted                                          | Cysteine-rich CPCC domain (IPR025983)                                                                                       |
| 0349                                                                                                                                                                                                                                                                                                                                                                      | 75 aa          | conserved protein of unknown function                           | None predicted                                          | None predicted                                                                                                              |
| 0350                                                                                                                                                                                                                                                                                                                                                                      | 126 aa         | conserved protein of unknown function                           | None predicted                                          | None predicted                                                                                                              |

S3 Table, continued:

|                                                                                                                                                                                                                                                                                                         | Locus tag<br>(LMR479A_) | Protein<br>length | Annotation<br>(R479a GenBank file)                          | Protein family membership<br>(INTERPROSCAN)                                                                          | Domains and repeats<br>(INTERPROSCAN)                                                                                                                                                                                                                   |
|---------------------------------------------------------------------------------------------------------------------------------------------------------------------------------------------------------------------------------------------------------------------------------------------------------|-------------------------|-------------------|-------------------------------------------------------------|----------------------------------------------------------------------------------------------------------------------|---------------------------------------------------------------------------------------------------------------------------------------------------------------------------------------------------------------------------------------------------------|
| <b>LMR479A_0528-0532 is inserted between lmo0520 and lmo0521 in EGD-e.</b>                                                                                                                                                                                                                              |                         |                   |                                                             |                                                                                                                      |                                                                                                                                                                                                                                                         |
|                                                                                                                                                                                                                                                                                                         | 0528                    | 1020 aa           | Type I restriction enzyme, R subunit                        | None predicted                                                                                                       | Restriction endonuclease, type I, HsdR, N-terminal (IPR007409), P-loop containing nucleoside triphosphate hydrolase (IPR027417), Helicase/UvrB domain (IPR006935), Type I restriction and modification enzyme, subunit R, C-terminal (IPR022625)        |
|                                                                                                                                                                                                                                                                                                         | 0529                    | 529 aa            | Type I restriction enzyme M protein                         | Restriction endonuclease, type I, HsdM (IPR004546)                                                                   | S-adenosyl-L-methionine-dependent methyltransferase (IPR029063), N6 adenine-specific DNA methyltransferase, N-terminal domain (IPR022749), S-adenosyl-L-methionine-dependent methyltransferase (IPR029063), DNA methylase, adenine-specific (IPR003356) |
|                                                                                                                                                                                                                                                                                                         | 0530                    | 397 aa            | conserved protein of unknown function                       | None predicted                                                                                                       | 2x Restriction endonuclease, type I, HsdS (IPR000055),                                                                                                                                                                                                  |
|                                                                                                                                                                                                                                                                                                         | 0531                    | 309 aa            | Integrase                                                   | None predicted                                                                                                       | Integrase/recombinase, N-terminal (IPR023109), Integrase, catalytic (IPR002104)                                                                                                                                                                         |
|                                                                                                                                                                                                                                                                                                         | 0532                    | 358 aa            | Type I restriction enzyme, S subunit                        | None predicted                                                                                                       | 2x Restriction endonuclease, type I, HsdS (IPR000055),                                                                                                                                                                                                  |
| <b>LMR479A_0811 is inserted in place of lmo0792 (clean change of genes, homologues on either side)</b>                                                                                                                                                                                                  |                         |                   |                                                             |                                                                                                                      |                                                                                                                                                                                                                                                         |
|                                                                                                                                                                                                                                                                                                         | 0811                    | 421 aa            | conserved exported protein of unknown function              | None predicted                                                                                                       | None predicted                                                                                                                                                                                                                                          |
| <b>LMR479A_1125-1143 are inserted between lmo1096 (homologue to LMR479A_1124) and lmo1124 (homologue to LMR479A_1144) in EGD-e (EGD-e has different genes at this location, with some short patches of homology). lmo1096-1126 are anchor genes for hypervariable hotspot #8 (Kuenne et al., 2013).</b> |                         |                   |                                                             |                                                                                                                      |                                                                                                                                                                                                                                                         |
|                                                                                                                                                                                                                                                                                                         | 1125                    | 637 aa            | Site-specific DNA-methyltransferase (Adenine-specific)      | N6 adenine-specific DNA methyltransferase, D21 class (IPR002295), Restriction/modification DNA-methylase (IPR001091) | Type III restriction/modification enzyme methylation subunit (IPR022221), 2x S-adenosyl-L-methionine-dependent methyltransferase (IPR029063), DNA methylase N-4/N-6 (IPR002941)                                                                         |
|                                                                                                                                                                                                                                                                                                         | 1126                    | 925 aa            | Type III restriction enzyme                                 | None predicted                                                                                                       | 2x P-loop containing nucleoside triphosphate hydrolase (IPR027417), Helicase/UvrB domain (IPR006935)                                                                                                                                                    |
|                                                                                                                                                                                                                                                                                                         | 1127                    | 42 aa             | Phage integrase family site-specific recombinase (fragment) | None predicted                                                                                                       | None predicted                                                                                                                                                                                                                                          |
|                                                                                                                                                                                                                                                                                                         | 1128                    | 58 aa             | conserved protein of unknown function                       | None predicted                                                                                                       | None predicted                                                                                                                                                                                                                                          |
|                                                                                                                                                                                                                                                                                                         | 1131                    | 42 aa             | protein of unknown function                                 | None predicted                                                                                                       | None predicted                                                                                                                                                                                                                                          |
|                                                                                                                                                                                                                                                                                                         | 1132                    | 101 aa            | protein of unknown function                                 | None predicted                                                                                                       | None predicted                                                                                                                                                                                                                                          |
|                                                                                                                                                                                                                                                                                                         | 1133                    | 601 aa            | conserved protein of unknown function                       | Abortive bacteriophage infection, resistance (IPR018891)                                                             | None predicted                                                                                                                                                                                                                                          |
|                                                                                                                                                                                                                                                                                                         | 1134                    | 225 aa            | conserved protein of unknown function                       | None predicted                                                                                                       | Cro/C1-type helix-turn-helix domain (IPR001387)                                                                                                                                                                                                         |
|                                                                                                                                                                                                                                                                                                         | 1135                    | 233 aa            | conserved protein of unknown function                       | None predicted                                                                                                       | Cro/C1-type helix-turn-helix domain (IPR001387)                                                                                                                                                                                                         |
| <b>LMR479A_2136-2138 is inserted between lmo2025-lmo2078(rliF) (homologue to LMR479A_2135, rliF unannotated) and lmo2028 (homologue to LMR479A_2139) in EGD-e (EGD-e has different genes at this location). lmo2025-2028 are anchor genes for hypervariable hotspot #9 (Kuenne et al., 2013).</b>       |                         |                   |                                                             |                                                                                                                      |                                                                                                                                                                                                                                                         |
|                                                                                                                                                                                                                                                                                                         | 2137                    | 151 aa            | conserved protein of unknown function                       | Bacteriophage abortive infection AbiH (IPR025935)                                                                    | None predicted                                                                                                                                                                                                                                          |
|                                                                                                                                                                                                                                                                                                         | 2138                    | 202 aa            | conserved protein of unknown function                       | Bacteriophage abortive infection AbiH (IPR025935)                                                                    | None predicted                                                                                                                                                                                                                                          |
| <b>LMR479A_2719-2720 is inserted between lmo2589 (homologue to LMR479A_2718) and a tRNA/rRNA operon (lmo16-18/LMR479A_rRNA4) in EGD-e.</b>                                                                                                                                                              |                         |                   |                                                             |                                                                                                                      |                                                                                                                                                                                                                                                         |
|                                                                                                                                                                                                                                                                                                         | 2719                    | 215 aa            | conserved exported protein of unknown function              | None predicted                                                                                                       | None predicted                                                                                                                                                                                                                                          |
|                                                                                                                                                                                                                                                                                                         | 2720                    | 178 aa            | conserved exported protein of unknown function              | Peptidase M10A (IPR021190)                                                                                           | Metallopeptidase, catalytic domain (IPR024079), Peptidase M10, metallopeptidase (IPR001818)                                                                                                                                                             |
| <b>LMR479A_2950 is inserted between lmo2812 and lmo2813 in EGD-e.</b>                                                                                                                                                                                                                                   |                         |                   |                                                             |                                                                                                                      |                                                                                                                                                                                                                                                         |
|                                                                                                                                                                                                                                                                                                         | 2950                    | 176 aa            | conserved protein of unknown function                       | Protein of unknown function DUF4303 (IPR025409)                                                                      | None predicted                                                                                                                                                                                                                                          |
